# Supplementary material
Source: Springer Nature journal article supplement (https://www.springermedizin.de/resource/supplementary/12884_2011_468_MOESM1_ESM.pdf/9457976)

# Women's Groups Participatory Action Cycle

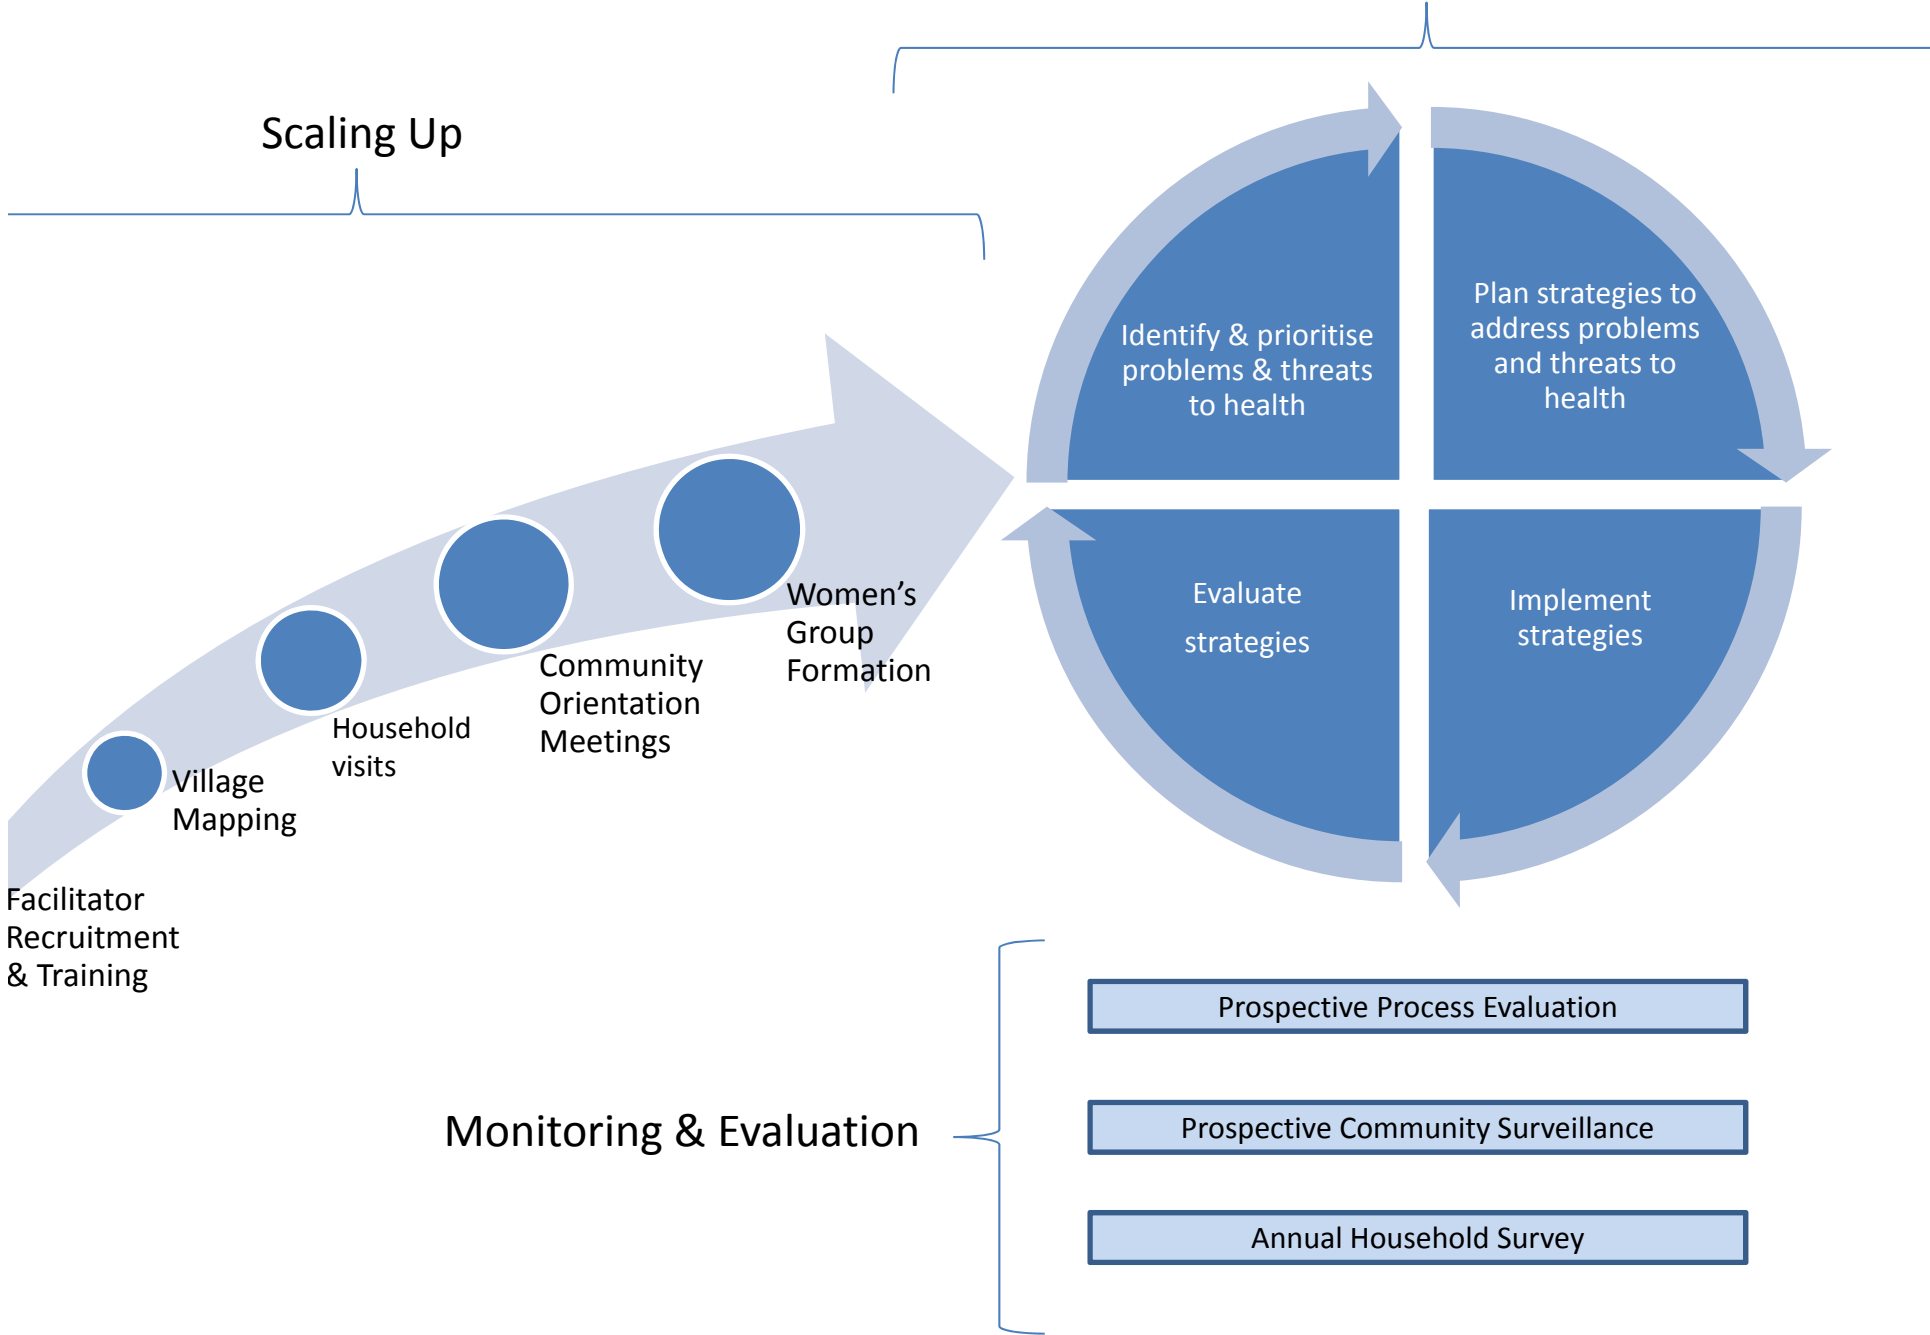

Supplement: MOESM1 [file 9457976]
